# Supplementary material for: A Dinuclear Copper(II) Complex Electrochemically Obtained via the Endogenous Hydroxylation of a Carbamate Schiff Base Ligand: Synthesis, Structure and Catalase Activity
Source: MDPI journal article supplement (doi:10.3390/ijms25042154), 2024-02-10
Supplement: s1 [file s1]

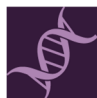

*Supporting Information*

# A Dinuclear Copper(II) Complex Electrochemically Obtained via the Endogenous Hydroxylation of a Carbamate Schiff Base Ligand: Synthesis, Structure and Catalase Activity

Sandra Fernández-Fariña <sup>1</sup>, Isabel Velo-Helena <sup>2</sup>, Laura Rodríguez-Silva <sup>1</sup>, Marcelino Maneiro <sup>1</sup>, Ana M. González-Noya <sup>2</sup> and Rosa Pedrido <sup>2,\*</sup>

<sup>1</sup> Departamento de Química Inorgánica, Facultade de Ciencias, Campus Terra, Universidade de Santiago de Compostela, 27002 Lugo, Spain; sandra.fernandez.farina@usc.es (S.F.-F.) laura.rodriguez@usc.es (L.R.-S.); marcelino.maneiro@usc.es (M.M.)

<sup>2</sup> Departamento de Química Inorgánica, Facultade de Química, Campus Vida, Universidade de Santiago de Compostela, 15782 Santiago de Compostela, Spain; mariaisabel.velo.helena@usc.es (I.V.-H.); ana.gonzalez.noya@usc.es (A.M.G.-N.)

\* Correspondence: rosa.pedrido@usc.es

## 1. Schiff base ligand H<sub>2</sub>L

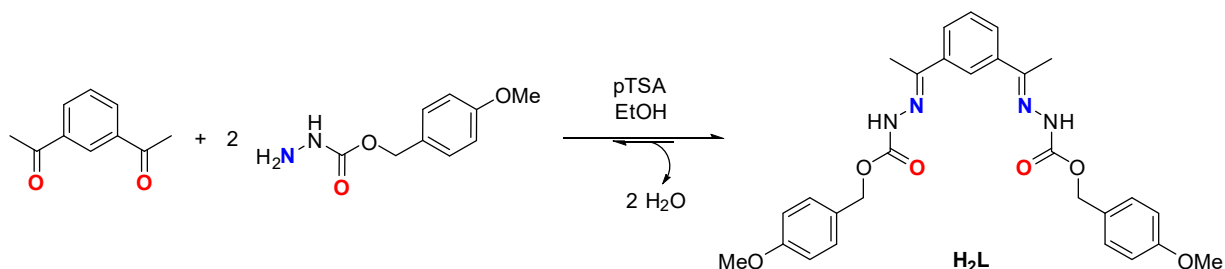

Figure S1. Synthesis of the Schiff base ligand H<sub>2</sub>L

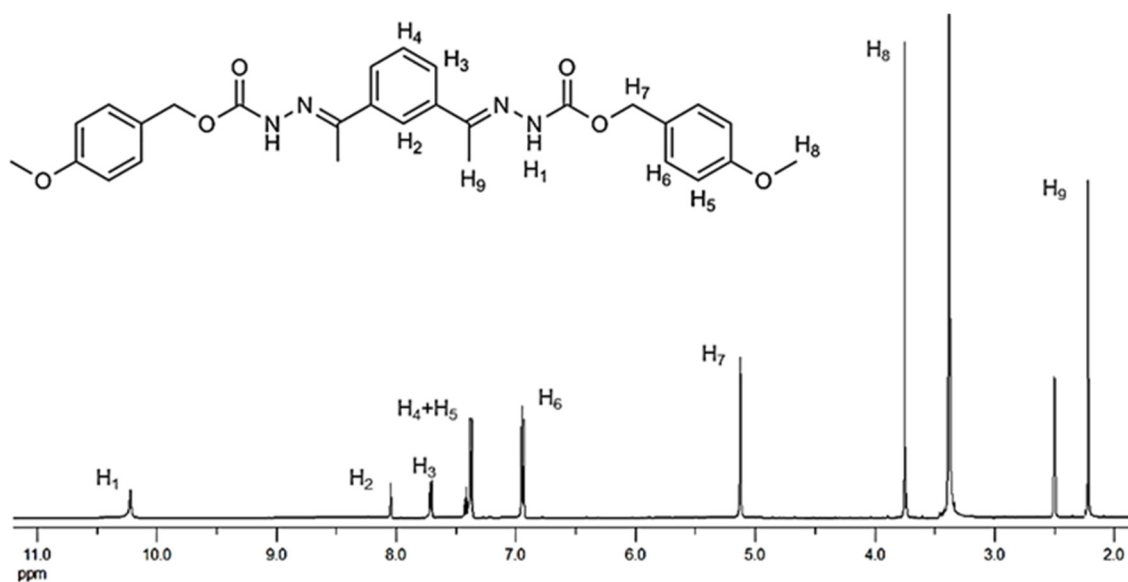

Figure S2. <sup>1</sup>H NMR spectra of H<sub>2</sub>L (400 MHz, DMSO-d<sub>6</sub>, r.t., δ (m, nH, H<sub>x</sub>, J)): 10.24 (s, 2H, H<sub>1</sub>), 8.03 (s, 2H, H<sub>2</sub>), 7.70 (d, 2H, H<sub>3</sub>, J = 7.8 Hz), 7.39–7.35 (t+d, 1H+4H, H<sub>4</sub>+H<sub>5</sub>, J<sub>1</sub> = 7.8 Hz, J<sub>2</sub> = 8.6 Hz), 6.90 (d, 2H, H<sub>6</sub>, J = 8.6 Hz), 5.11 (s, 4H, H<sub>7</sub>), 3.74 (s, 6H, H<sub>8</sub>), 2.21 (s, 6H, H<sub>9</sub>).

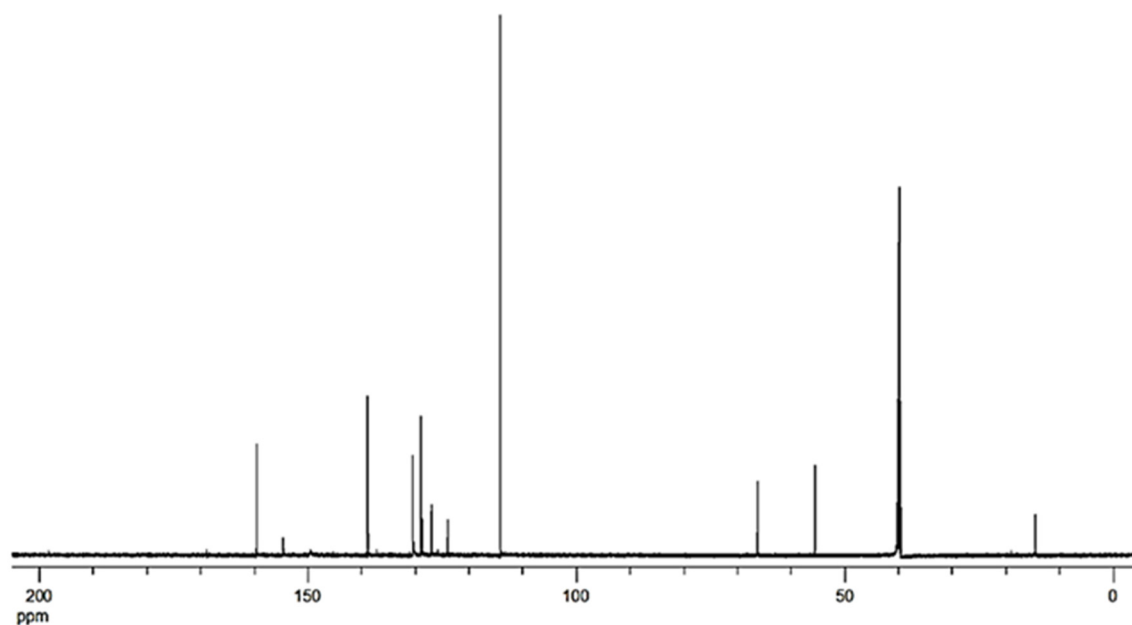

Figure S3.  $^{13}\text{C}$  NMR spectra of  $\text{H}_2\text{L}$  (400 MHz,  $\text{DMSO-d}_6$ , r.t.,  $\delta$  (m, nH, Hx, J)): 159.5 (C=O), 154.5 (Car-O), 149.5 (C=N), 138.8 (Car), 130.5 (Car), 128.9 (CHar), 128.7 (CHar), 127.0 (CHar), 124.0 (CHar), 114.2 (CHar), 66.4 (CH<sub>2</sub>), 55.3 (OCH<sub>3</sub>), 14.2 (CH<sub>3</sub>).

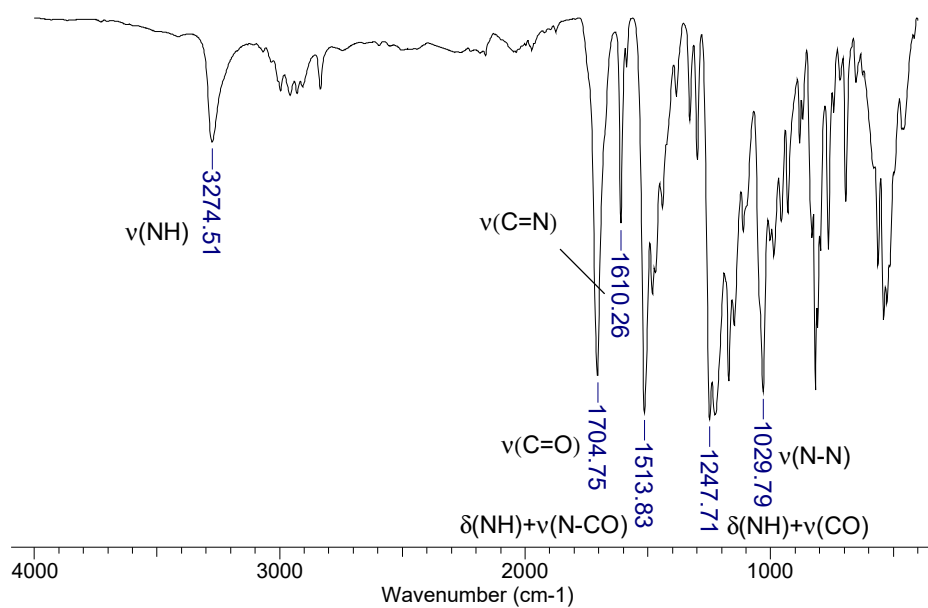

Figure S4. Infrared spectra the Schiff base ligand  $\text{H}_2\text{L}$ .

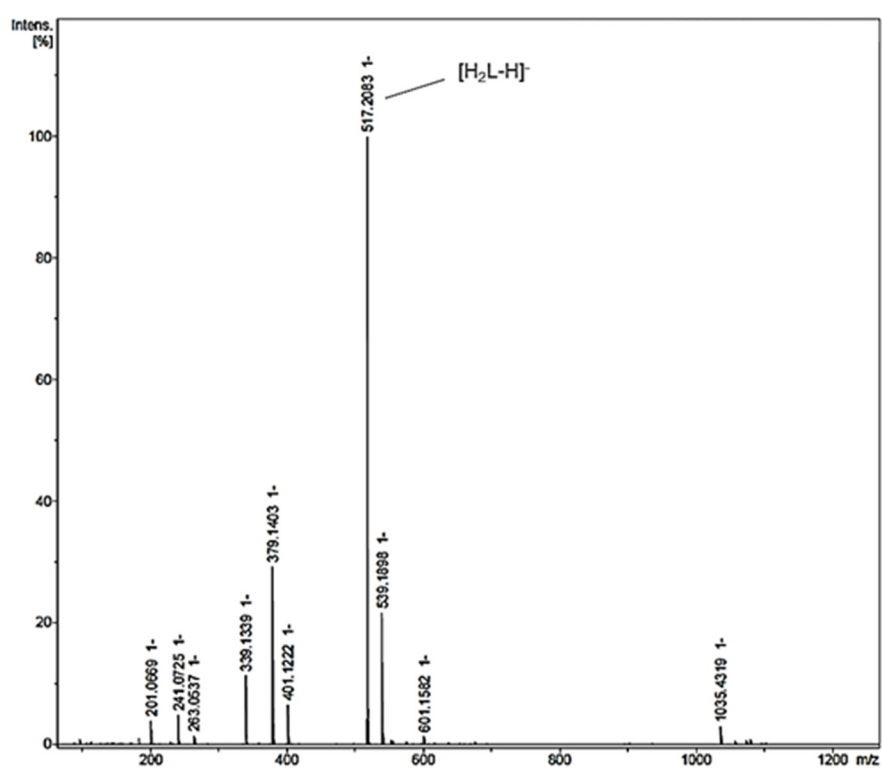

Figure S5. Mass spectra of the Schiff base ligand  $H_2L$

## 2. Copper(II) complex $[\text{Cu}_2(\text{L}^1)(\text{OH})]$

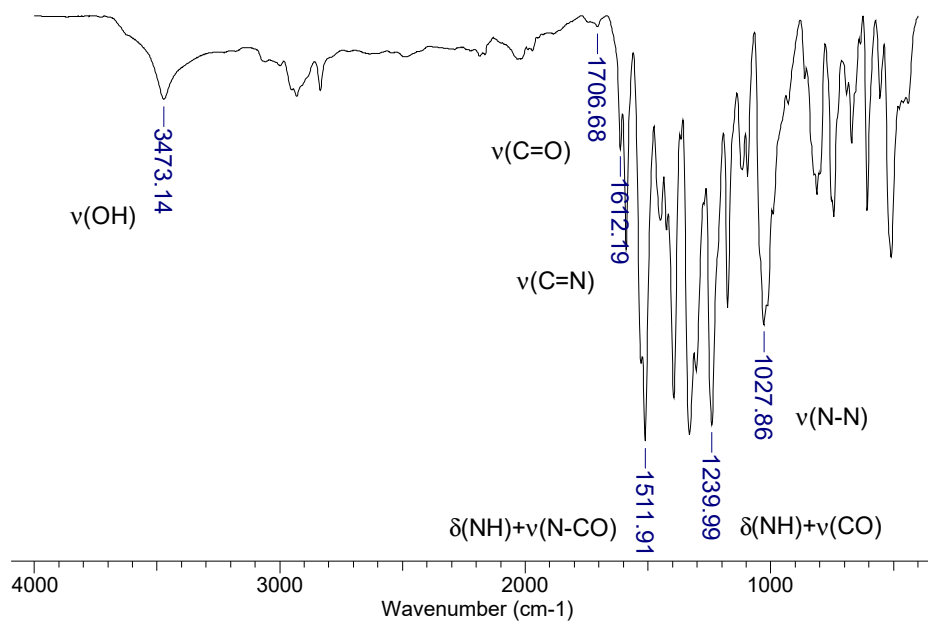

Figure S6. Infrared spectra of  $[\text{Cu}_2(\text{L}^1)(\text{OH})]$ .

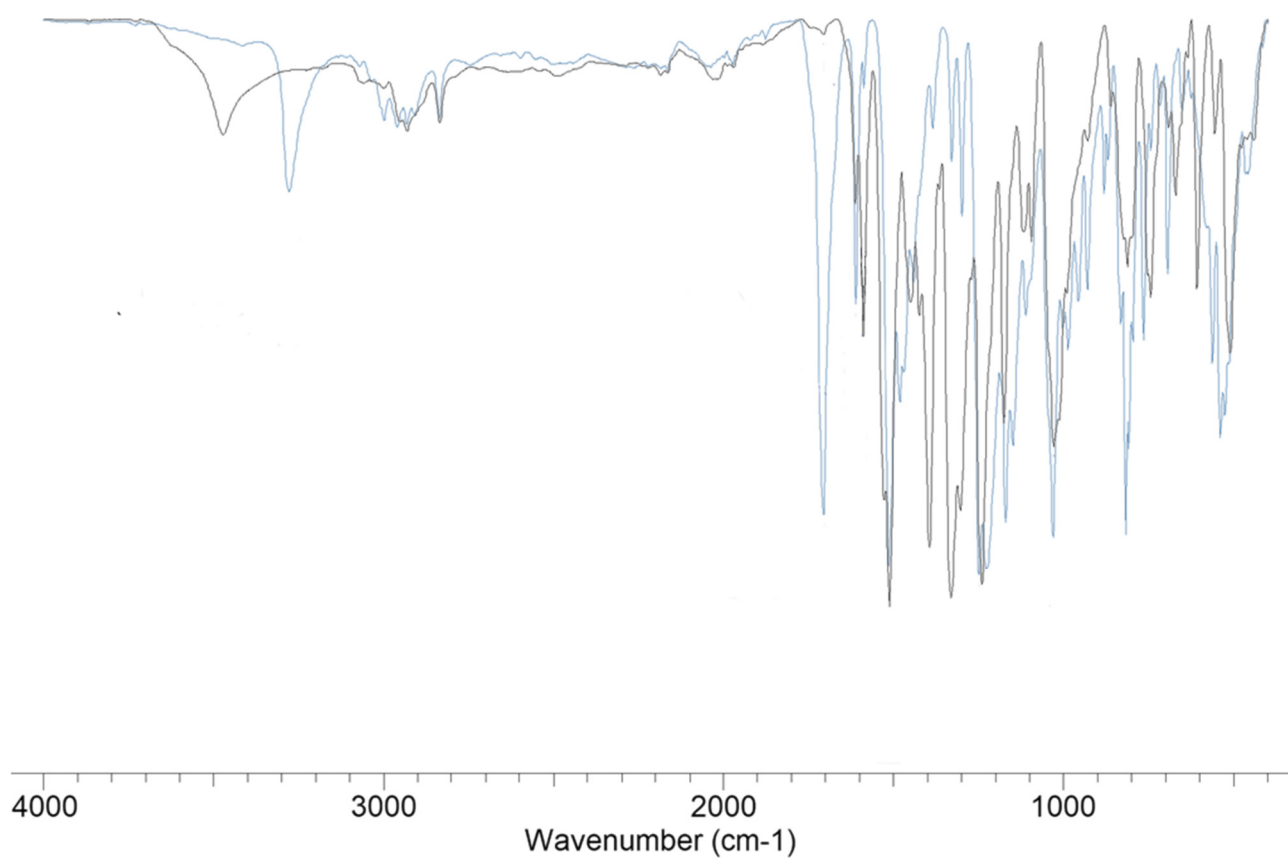

Figure S7. Superposition of the infrared spectra of the copper complex  $[\text{Cu}_2(\text{L}^1)(\text{OH})]$  (black) and the  $\text{H}_2\text{L}$  ligand (blue).

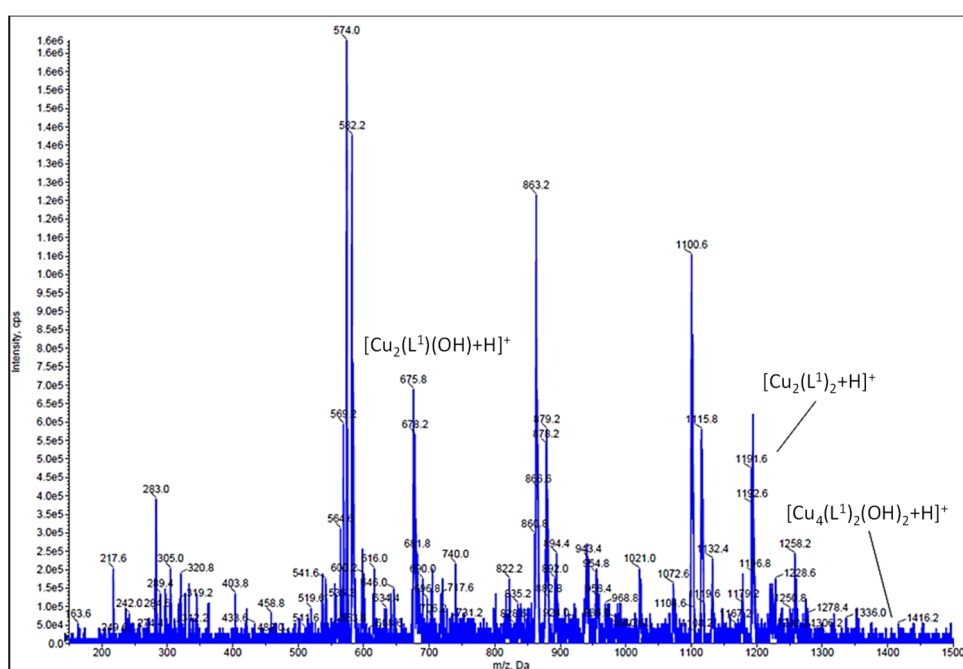Figure S8. Mass spectra of the  $[\text{Cu}_2(\text{L}^1)(\text{OH})]$ .

Table S1. Main crystallographic data for  $[\text{Cu}_2(\text{L}^1)(\text{OH})]\cdot 2\text{CH}_3\text{CN}$ .

| $[\text{Cu}_2(\text{L}^1)(\text{OH})]\cdot 2\text{CH}_3\text{CN}$ |                                                                   |
|-------------------------------------------------------------------|-------------------------------------------------------------------|
| Molecular formula                                                 | $\text{Cu}_4\text{C}_{60}\text{H}_{62}\text{N}_{10}\text{O}_{16}$ |
| Molecular weight                                                  | 1433.36                                                           |
| Spatial group                                                     | $P-1$                                                             |
| Crystalline system                                                | Triclinic                                                         |
| Crystal size/mm                                                   | $0.15 \times 0.07 \times 0.03$                                    |
| $a/\text{\AA}$                                                    | 9.0922(2)                                                         |
| $b/\text{\AA}$                                                    | 11.8957(3)                                                        |
| $c/\text{\AA}$                                                    | 14.0610(4)                                                        |
| $\alpha/^\circ$                                                   | 94.0500(10)                                                       |
| $\beta/^\circ$                                                    | 90.3190(10)                                                       |
| $\gamma/^\circ$                                                   | 103.8490(10)                                                      |
| Temperature/K                                                     | 100                                                               |
| Volume/ $\text{\AA}^3$                                            | 1472.52(7)                                                        |
| Z                                                                 | 1                                                                 |
| Measured reflexions                                               | 32274                                                             |
| Unique reflexions [ $R_{\text{int}}$ ]                            | 8768 [0.0421]                                                     |
| $\mu/\text{mm}^{-1}$                                              | 1.505                                                             |
| Residues/ $\text{e \AA}^{-3}$                                     | -0.49 and -0.53                                                   |
| R                                                                 | 0.0829                                                            |
| $wR$                                                              | 0.0771                                                            |

Table S2. Main bond distances and angles for [Cu<sub>2</sub>(L<sup>1</sup>)(OH)]·2CH<sub>3</sub>CN.

| Bond distances (Å) |            |             |            |               |            |
|--------------------|------------|-------------|------------|---------------|------------|
| Cu1-O39            | 1.9104(17) | Cu1-O28     | 1.9185(15) | C27-O28       | 1.2770(3)  |
| Cu1-O40            | 1.9234(15) | Cu2-N9      | 1.9145(19) | C27-N26       | 1.3160(3)  |
| Cu2-O39            | 1.9371(17) | Cu2-O12     | 1.9524(15) | O39-Cu2i      | 2.3311(17) |
| Cu2-O40            | 1.9498(15) | N9-N10      | 1.3990(2)  | Cu2-O39i      | 2.3311(17) |
| Cu1-Cu2            | 2.9233(4)  | N25-N26     | 1.4020(2)  | Cu1-O12i      | 2.6780     |
| C1-O40             | 1.3340(3)  | C11-O12     | 1.2880(3)  | O12-Cu1i      | 2.6780     |
| Cu1-N25            | 1.9105(19) | C11-N10     | 1.3050(3)  |               |            |
| Bond angles (°)    |            |             |            |               |            |
| O39-Cu1-N25        | 174.57(8)  | O40-Cu1-N25 | 92.66(7)   | O28-Cu1-Cu2   | 141.88(5)  |
| O39-Cu1-O28        | 101.66(7)  | O40-Cu2-O12 | 173.46(7)  | O40-Cu1-Cu2   | 41.34(4)   |
| O39-Cu1-O40        | 82.00(7)   | O40-Cu2-N9  | 91.13(7)   | O39-Cu2i-O40i | 99.06(6)   |
| O39-Cu2-O40        | 80.64(7)   | N25-Cu1-O28 | 83.73(7)   | O39-Cu2i-N9i  | 107.84(7)  |
| O39-Cu2-N9         | 169.70(8)  | N9-Cu2-O12  | 83.70(7)   | O12-Cu2-O39i  | 86.37(6)   |
| O39-Cu2-O12        | 104.03(7)  | O39-Cu1-Cu2 | 40.90(5)   | O39-Cu2-O39i  | 79.78(7)   |
| O40-Cu1-O28        | 175.02(7)  | N25-Cu1-Cu2 | 133.85(6)  |               |            |
